# Supplementary material for: PRAME as an Independent Biomarker for Metastasis in Uveal Melanoma
Source: Oxford University Press journal article supplement (doi:10.1158/1078-0432.ccr-15-2071), 2016-02-29
Supplement: 10780432ccr152071-sup-154645_1_supp_3159970_nv710g.docx [file 10780432ccr152071-sup-154645_1_supp_3159970_nv710g.docx]

**Supplementary Table 2.** Comparison of features between uveal melanoma subgroups

| **Variable** | **Class1met-**  **(n=17)*** | **Class1met+**  **(n=12)** | **Class2met+**  **(n=63)** | **Pair-wise comparisons**  **P-value**** |
| --- | --- | --- | --- | --- |
| Age (years)  Mean  Median  Range | 52.8  55  25-75 | 54.0  56  24-73 | 65.1  64  37-86 | 0.7  0.04 |
| Sex  Female  Male | 11 (65%)  6 (35%) | 4 (33%)  8 (67%) | 30 (48%)  33 (52%) | 0.1  0.5 |
| Largest basal tumor diameter (mm)  Mean  Median  Range | 16.4  17  8-22 | 16.8  17  9-24 | 17.0  17  8-24 | 0.9  0.8 |
| Tumor thickness (mm)  Mean  Median  Range | 8.7  9.1  1.0-15.0 | 6.9  6.6  2.7-13.4 | 7.8  7.3  2.4-16.4 | 0.2  0.3 |
| Ciliary body involvement  Yes  No  Not available | 8 (53%)  7 (47%)  2 | 4 (33%)  8(67%)  0 | 41 (71%)  17 (29%)  5 | 0.4  0.02 |
| Mixed or epithelioid cytology  Yes  No  Not available | 8 (53%)  7 (47%)  2 | 8 (73%)  3 (27%)  1 | 48 (80%)  12 (20%)  3 | 0.4  0.7 |

*Class1met- cases were included only if there was >6 years follow-up.

** First row, Class1met- versus Class1met+; Second row, Class1met+ versus Class2met+.
