# Supplementary material for: PRAME as an Independent Biomarker for Metastasis in Uveal Melanoma
Source: Oxford University Press journal article supplement (doi:10.1158/1078-0432.ccr-15-2071), 2016-02-29
Supplement: 10780432ccr152071-sup-154645_1_supp_3159971_nv710g.docx [file 10780432ccr152071-sup-154645_1_supp_3159971_nv710g.docx]

**Supplementary Table 3.** Clinicopathologic and genomic features in the 12 patients with Class1met+ uveal melanomas

| **Variable** | **NB063** | **NB114** | **NB267** | **MM010** | **MM016** | **MM061** | **MM065** | **MM077** | **MM089** | **MM092** | **MM115** | **MM168** |
| --- | --- | --- | --- | --- | --- | --- | --- | --- | --- | --- | --- | --- |
| Age at Presentation | 74 | 66 | 51 | 41 | 24 | 66 | 44 | 50 | 73 | 60 | 68 | 32 |
| Sex | Female | Male | Male | Male | Female | Male | Female | Male | Male | Male | Female | Male |
| Eye | Left | Right | Right | Right | Left | Left | Right | Right | Right | Right | Left | Left |
| Ciliary Body | No | No | No | No | Yes | No | Yes | No | Yes | Yes | No | No |
| Diameter (mm) | 10 x 7 | 14 x 10 | 17 x 11 | 17 x 16 | 24 x 20 | 11 x 7 | 24 x 14 | 24 x 12 | 18 x 16 | 20 x 20 | 14 x 7 | 9 x 8 |
| Thickness (mm) | 3.6 | 3.3 | 2.7 | 10.0 | 12.6 | 4.2 | 6.9 | 7.9 | 8.1 | 13.4 | 4.3 | 6.3 |
| Primary Treatment | Plaque | Plaque | Plaque | Enucleation | Enucleation | Enucleation | Enucleation | Enucleation | Enucleation | Enucleation | Plaque | Enucleation |
| Cell Type | N/A | Epithelioid | Mixed | Mixed | Spindle | Mixed | Mixed | Mixed | Spindle | Epithelioid | Mixed | Mixed |
| Extraocular extension | Yes | No | No | No | No | Yes | No | No | Yes | No | No | Yes |
| GEP Discriminant Score | -0.800 | -0.57 | -0.50 | -1.17 | -0.92 | -0.98 | -0.75 | -0.69 | -0.72 | -1.03 | -0.08 | -1.16 |
| GNAQ | N/A | N/A | N/A | Wildtype | Mutant | Mutant | Mutant | Mutant | Mutant | Wildtype | Wildtype | N/A |
| GNA11 | N/A | N/A | N/A | Wildtype | Wildtype | Wildtype | Wildtype | Wildtype | Wildtype | Mutant | N/A | N/A |
| BAP1 | N/A | N/A | N/A | Wildtype | Wildtype | Wildtype | Wildtype | Wildtype | Wildtype | Wildtype | Wildtype | N/A |
| SF3B1 | N/A | N/A | N/A | Mutant | Wildtype | Mutant | Mutant | Mutant | Wildtype | Wildtype | Wildtype | N/A |
| EIF1AX | N/A | N/A | N/A | Wildtype | Wildtype | N/A | Wildtype | Wildtype | Wildtype | Wildtype | N/A | N/A |
| Chromosome 3 | N/A | Disomy | N/A | Disomy | Disomy | Disomy | Disomy | Disomy | Disomy | Disomy | Monosomy | N/A |
| Local Recurrence | Yes | No | No | No | No | No | No | No | No | No | Yes | No |
| Last Status | Dead of metastasis | Dead of metastasis | Alive with metastasis | Dead of metastasis | Alive with metastasis | Alive with metastasis | Dead of metastasis | Dead of metastasis | Dead of metastasis | Alive with metastasis | Dead of metastasis | Alive with metastasis |
| Location of metastasis | Liver | Liver | Lung,  Mediastinum | Lung | Liver | Liver,  Stomach | Pelvis | Liver | Spine | Lung, Spine,  Pelvis | Liver,  Stomach | Lung,  Mediastinum |
| PFS (months) | 13.0 | 44.1 | 4.5 | 114.2 | 87.8 | 89.7 | 22.0 | 25.0 | 4.5 | 47.8 | 26.2 | 0.0 |
| OS (months) | 16.9 | 44.6 | 4.5 | 141.7 | 87.8 | 95.4 | 31.5 | 34.2 | 8.1 | 57.3 | 64.8 | 0.3 |

N/A, not available; plaque, I-125 plaque brachytherapy; GEP, gene expression profile; PFS, progression-free survival; OS, overall survival.
