# Supplementary material for: PRAME as an Independent Biomarker for Metastasis in Uveal Melanoma
Source: Oxford University Press journal article supplement (doi:10.1158/1078-0432.ccr-15-2071), 2016-02-29
Supplement: 10780432ccr152071-sup-154645_1_supp_3160033_nv724h.xlsx [file 10780432ccr152071-sup-154645_1_supp_3160033_nv724h.xlsx]

## Sheet: Chr Up in Class1PRAME+
Supplementary Table 5. Gene ontology analysis of genes differentially expressed between Class1PRAME+ tumors and Class1PRAME- tumors
Gene Set Enrichment Analysis of genes upregulated in Class1PRAME+ tumors compared to Class1PRAME- tumors with respect to chromosomal location
Overlap Results
Collection(s):	C1
# overlaps shown:	5
# genesets in collections:	326
# genes in comparison (n):	93
# genes in universe (N):	45956
Gene Set Name	# Genes in Gene Set (K)	Description	# Genes in Overlap (k)	k/K	p-value	FDR q-value
chr6p21	544	Genes in cytogenetic band chr6p21	19	0.0349	2.31e-18	7.52e-16
chr8q24	214	Genes in cytogenetic band chr8q24	11	0.0514	7.52e-13	1.23e-10
chr1q42	153	Genes in cytogenetic band chr1q42	7	0.0458	2.94e-08	3.2e-06
chr6p22	180	Genes in cytogenetic band chr6p22	6	0.0333	1.91e-06	0.000156
chr1q21	358	Genes in cytogenetic band chr1q21	6	0.0168	9.24e-05	0.00602
Gene/Gene Set Overlap Matrix
Entrez Gene Id	Gene Symbol	Gene Description	chr6p21	chr8q24	chr1q42	chr6p22	chr1q21
1616	DAXX	death-domain associated protein	X
203068	TUBB	tubulin, beta class I	X
221504	ZBTB9	zinc finger and BTB domain containing 9	X
3006	HIST1H1C	histone cluster 1, H1c	X
30834	ZNRD1	zinc ribbon domain containing 1	X
387032	ZKSCAN4	zinc finger with KRAB and SCAN domains 4	X
4201	MEA1	male-enhanced antigen 1	X
4758	NEU1	sialidase 1 (lysosomal sialidase)	X
51069	MRPL2	mitochondrial ribosomal protein L2	X
57819	LSM2	LSM2 homolog, U6 small nuclear RNA associated (S. cerevisiae)	X
63943	FKBPL	FK506 binding protein like	X
64928	MRPL14	mitochondrial ribosomal protein L14	X
6631	SNRPC	small nuclear ribonucleoprotein polypeptide C	X
6903	TBCC	tubulin folding cofactor C	X
705	BYSL	bystin-like	X
7918	GPANK1	G patch domain and ankyrin repeats 1	X
7923	HSD17B8	hydroxysteroid (17-beta) dehydrogenase 8	X
79897	RPP21	ribonuclease P/MRP 21kDa subunit	X
9533	POLR1C	polymerase (RNA) I polypeptide C, 30kDa	X
10656	KHDRBS3	KH domain containing, RNA binding, signal transduction associated 3		X
11156	PTP4A3	protein tyrosine phosphatase type IVA, member 3		X
286075	ZNF707	zinc finger protein 707		X
340385	ZNF517	zinc finger protein 517		X
50626	CYHR1	cysteine/histidine-rich 1		X
54512	EXOSC4	exosome component 4		X
7553	ZNF7	zinc finger protein 7		X
81858	SHARPIN	SHANK-associated RH domain interactor		X
84232	MAF1	MAF1 homolog (S. cerevisiae)		X
84948	TIGD5	tigger transposable element derived 5		X
93100	NAPRT1	nicotinate phosphoribosyltransferase domain containing 1		X
116841	SNAP47	synaptosomal-associated protein, 47kDa			X
128061	C1orf131	chromosome 1 open reading frame 131			X
128308	MRPL55	mitochondrial ribosomal protein L55			X
3020	H3F3A	H3 histone, family 3A			X
55746	NUP133	nucleoporin 133kDa			X
79169	C1orf35	chromosome 1 open reading frame 35			X
9816	URB2	URB2 ribosome biogenesis 2 homolog (S. cerevisiae)			X
2178	FANCE	Fanconi anemia, complementation group E				X
5987	TRIM27	tripartite motif containing 27				X
8362	HIST1H4K	histone cluster 1, H4k				X
8365	HIST1H4H	histone cluster 1, H4h				X
85236	HIST1H2BK	histone cluster 1, H2bk				X
8968	HIST1H3F	histone cluster 1, H3f				X
128240	APOA1BP	apolipoprotein A-I binding protein					X
51027	BOLA1	bolA homolog 1 (E. coli)					X
723790	HIST2H2AA4	histone cluster 2, H2aa4					X
79590	MRPL24	mitochondrial ribosomal protein L24					X
8337	HIST2H2AA3	histone cluster 2, H2aa3					X
8338	HIST2H2AC	histone cluster 2, H2ac					X

## Sheet: Chr Down in Class1PRAME+
Supplementary Table 5. Gene ontology analysis of genes differentially expressed between Class1PRAME+ tumors and Class1PRAME- tumors
Gene Set Enrichment Analysis of genes downregulated in Class1PRAME+ tumors compared to Class1PRAME- tumors with respect to chromosomal location
Overlap Results
Collection(s):	C1
# overlaps shown:	8
# genesets in collections:	326
Supplementary Table 4. Gene Set Enrichment Analysis of genes differentially expressed between Class1PRAME+ tumors and Class1PRAME- tumors with respect to chromosomal location
# genes in comparison (n):	65
# genes in universe (N):	45956
Gene Set Name	# Genes in Gene Set (K)	Description	# Genes in Overlap (k)	k/K	p-value	FDR q-value
chr6q21	88	Genes in cytogenetic band chr6q21	7	0.0795	4.71e-11	1.33e-08
chr6q22	95	Genes in cytogenetic band chr6q22	7	0.0737	8.13e-11	1.33e-08
chr6q24	67	Genes in cytogenetic band chr6q24	4	0.0597	2.61e-06	0.000284
chr6q13	26	Genes in cytogenetic band chr6q13	3	0.1154	6.86e-06	0.000559
chr6q27	55	Genes in cytogenetic band chr6q27	3	0.0545	6.72e-05	0.00438
chr6q14	59	Genes in cytogenetic band chr6q14	3	0.0508	8.3e-05	0.00451
Gene/Gene Set Overlap Matrix
Entrez Gene Id	Gene Symbol	Gene Description	chr6q21	chr6q22	chr6q24	chr6q13	chr6q27	chr6q14
27244	SESN1	sestrin 1	X
4082	MARCKS	myristoylated alanine-rich protein kinase C substrate	X
51805	COQ3	coenzyme Q3 homolog, methyltransferase (S. cerevisiae)	X
57107	PDSS2	prenyl (decaprenyl) diphosphate synthase, subunit 2	X
7259	TSPYL1	TSPY-like 1	X
84154	RPF2	ribosome production factor 2 homolog (S. cerevisiae)	X
8724	SNX3	sorting nexin 3	X
221294	NT5DC1	5'-nucleotidase domain containing 1		X
221302	ZUFSP	zinc finger with UFM1-specific peptidase domain		X
254394	MCM9	minichromosome maintenance complex component 9		X
25842	ASF1A	ASF1 anti-silencing function 1 homolog A (S. cerevisiae)		X
81847	RNF146	ring finger protein 146		X
9465	AKAP7	A kinase (PRKA) anchor protein 7		X
9519	TBPL1	TBP-like 1		X
10981	RAB32	RAB32, member RAS oncogene family			X
23328	SASH1	SAM and SH3 domain containing 1			X
23593	HEBP2	heme binding protein 2			X
348995	NUP43	nucleoporin 43kDa			X
51020	HDDC2	HD domain containing 2				X
51389	RWDD1	RWD domain containing 1				X
594	BCKDHB	branched chain keto acid dehydrogenase E1, beta polypeptide				X
5134	PDCD2	programmed cell death 2					X
5689	PSMB1	proteasome (prosome, macropain) subunit, beta type, 1					X
84498	FAM120B	family with sequence similarity 120B					X
25821	MTO1	mitochondrial translation optimization 1 homolog (S. cerevisiae)						X
55754	TMEM30A	transmembrane protein 30A						X
6885	MAP3K7	mitogen-activated protein kinase kinase kinase 7						X

## Sheet: TF Up in Class1PRAME+
Supplementary Table 5. Gene ontology analysis of genes differentially expressed between Class1PRAME+ tumors and Class1PRAME- tumors
Gene Set Enrichment Analysis of genes upregulated in Class1PRAME+ tumors compared to Class1PRAME- tumors with respect to transcription factor binding sites
Gene Set Name [# Genes]	Transcription Factor	# Genes in Overlap	p-value	FDR q-value
KRCTCNNNNMANAGC_UNKNOWN [66]	Unknown	5	2.47 e-7	1.52 e-4
GATTGGY_V$NFY_Q6_01 [1160]	NFY	13	6.34 e-7	1.95 e-4
GGGCGGR_V$SP1_Q6 [2940]	SP1	18	2.18 e-5	4.48 e-3

## Sheet: TF Down in Class1PRAME+
Supplementary Table 5. Gene ontology analysis of genes differentially expressed between Class1PRAME+ tumors and Class1PRAME- tumors
Gene Set Enrichment Analysis of genes downregulated in Class1PRAME+ tumors compared to Class1PRAME- tumors with respect to transcription factor binding sites
No gene sets enriched at FDR<0.01

## Sheet: RAR Genes Down in Class1PRAME+
Supplementary Table 5. Gene ontology analysis of genes differentially expressed between Class1PRAME+ tumors and Class1PRAME- tumors
Genes containing retinoic acid receptor DR5 binding sites that were down-regulated in Class1PRAME+ tumors relative to Class1PRAME- tumors
Gene Symbol	FDR q-value
MAP3K7	0
MAP7	0
METTL9	0
PSMB1	0
RWDD1	0
CADPS2	0.01295
UFSP2	0.01295
AIG1	0.01399
FYCO1	0.01399
HSF2	0.01399
NAP1L1	0.01399
SMPDL3A	0.01399
AZI2	0.01544
ESRRG	0.02
FOXO3	0.02
GIMAP5	0.02
MANEA	0.02
NECAP1	0.02
PREP	0.02
RAB11FIP5	0.02
RPS27L	0.02
SCFD1	0.02
TFAP2C	0.02
UBA7	0.02
ANTXR2	0.02465
CNTN3	0.02465
EMCN	0.02465
FBXW7	0.02465
IFI16	0.02465
KIAA1147	0.02465
LRP11	0.02465
MED23	0.02465
NHLRC3	0.02465
PIK3IP1	0.02465
RFFL	0.02465
TEX2	0.02465
ASB1	0.03089
C16orf72	0.03089
CLTB	0.03089
FBXW4	0.03089
IQCK	0.03089
MFSD6	0.03089
MTX3	0.03089
RARB	0.03089
SERP2	0.03089
ZNF25	0.03089
ALDH2	0.04186
CCDC149	0.04186
CCNO	0.04186
CSNK2A2	0.04186
KCNA5	0.04186
PGS1	0.04186
POPDC3	0.04186
PSMF1	0.04186
TMEM173	0.04186
UNKL	0.04186
USO1	0.04186
YPEL3	0.04186
APOBEC3G	0.05344
CBLB	0.05344
DOCK11	0.05344
FBXO30	0.05344
HSD17B12	0.05344
KLC3	0.05344
NAT1	0.05344
OCIAD1	0.05344
RGL3	0.05344
SLC12A4	0.05344
SORBS1	0.05344
STAMBPL1	0.05344
WDR13	0.05344
YPEL5	0.05344
